# Supplementary material for: Secreted HMGB1 from Wnt activated intestinal cells is required to maintain a crypt progenitor phenotype
Source: PubMed Central journal article supplement (PMC5239505; doi:10.18632/oncotarget.10076), 2016-06-15
Supplement: oncotarget-07-51665-s001.pdf [file oncotarget-07-51665-s001.pdf]

## Secreted HMGB1 from Wnt activated intestinal cells is required to maintain a crypt progenitor phenotype

### SUPPLEMENTARY FIGURE

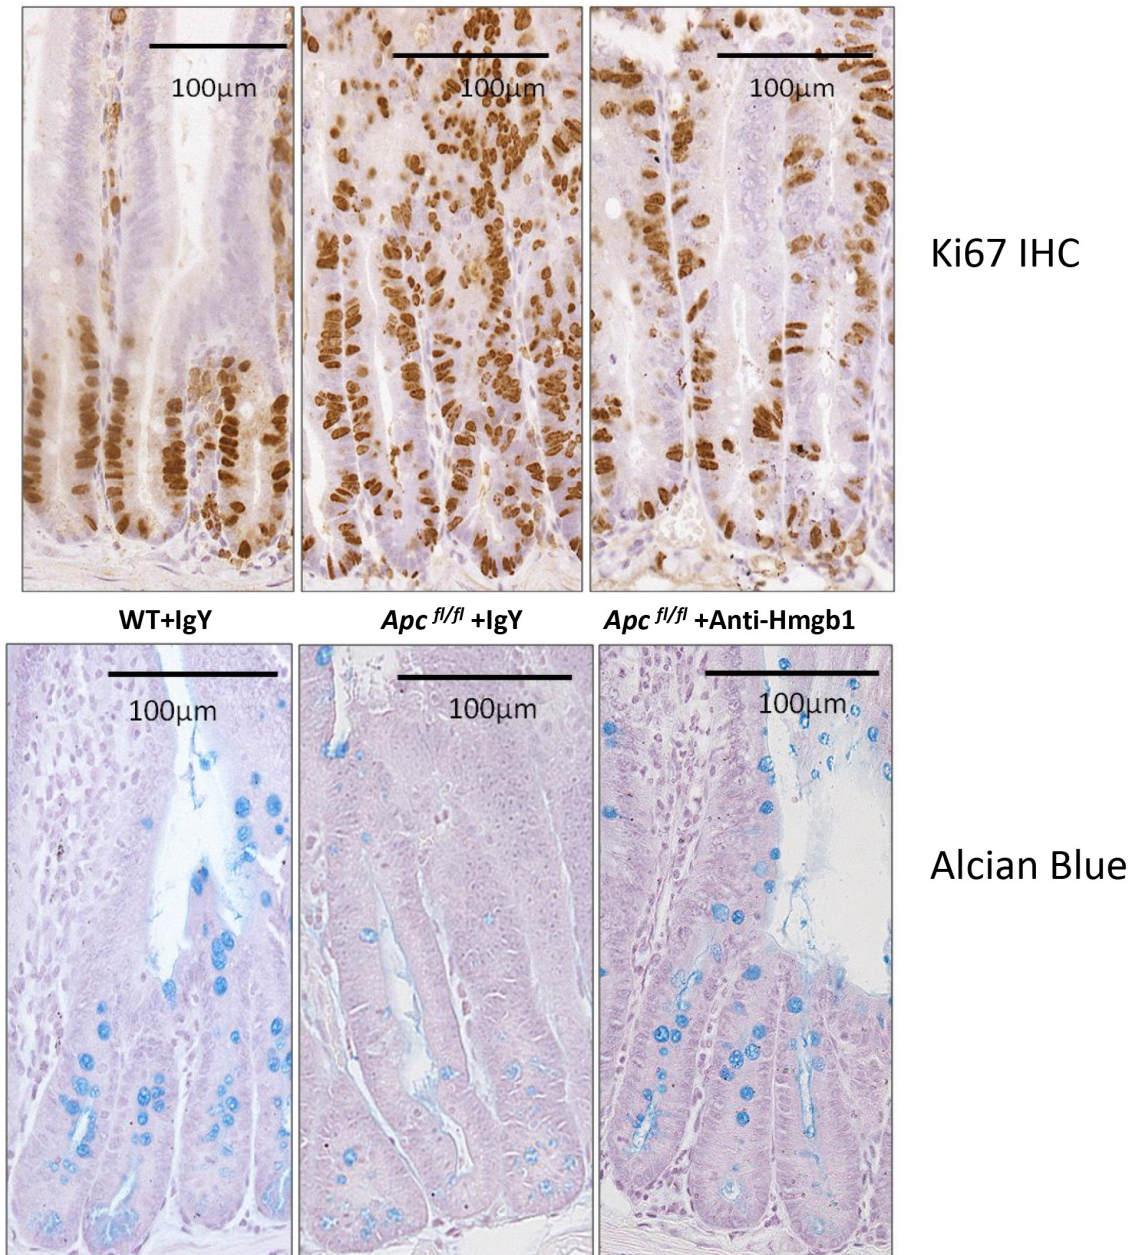

**Supplementary Figure 1: Cell proliferation and differentiation following neutralising HMGB1-antibody treatment.** IHC analysis for Ki67 and Alcian blue staining for Goblet cell differentiation on intestinal sections of control (WT) and induced *ApcFlox* day 4 post induction treated with IgY or anti-HMGB1 antibodies. Note the comparative reduction in levels of Ki67 and increased numbers of goblet cells in the anti-HMGB1 treated *ApcFlox* sections.
